# Supplementary material for: Gelatin functionalized graphene oxide for mineralization of hydroxyapatite: biomimetic and in vitro evaluation
Source: Royal Society of Chemistry journal article supplement (doi:10.1039/c4nr00355a), 2014-01-01
Supplement: c4nr00355a1.pdf [file c4nr00355a1.pdf]

# Gelatin Functionalized Graphene Oxide for mineralization of hydroxyapatite: Biomimetic and *In Vitro* Evaluation

Hongyan Liu<sup>ab</sup>, Ju Cheng<sup>c</sup>, Fengjuan Chen<sup>ab</sup>, Decheng Bai<sup>c</sup>, Changwei Shao<sup>d</sup>, Jun Wang<sup>d</sup>, Pinxian Xi<sup>\*ab</sup>, Zhengzhi Zeng<sup>\*ab</sup>

a Key Laboratory of Nonferrous Metal Chemistry and Resources Utilization of Gansu Province, State Key Laboratory of Applied Organic Chemistry, College of Chemistry and Chemical Engineering, Lanzhou University, Lanzhou 730000, P. R. China. E-mail: xipx@lzu.edu.cn, zengzhzh@lzu.edu.cn.

b The Research Center of Biomedical Nanotechnology, Lanzhou University, Lanzhou 730000, P. R. China.

c Key Lab of Preclinical Study for New Drugs of Gansu Province, School of Basic Medical Sciences, Lanzhou University, Lanzhou 730000, PR China.

d Advanced Ceramic Fibers and Composites laboratory, College of Aerospace and Materials Engineering, National University of Defense Technology, Changsha, 410073, PR China.

## Supplementary spectra

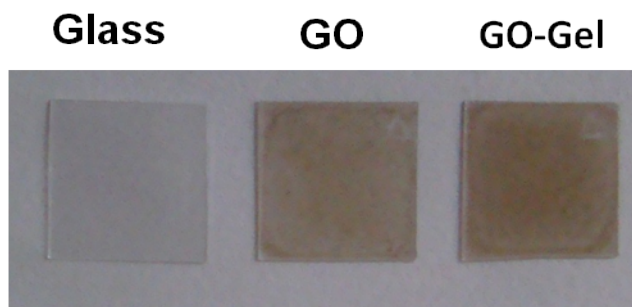

**Fig. S1** Optical images of glass and substrates modified with GO and GO-Gel nanomaterials.

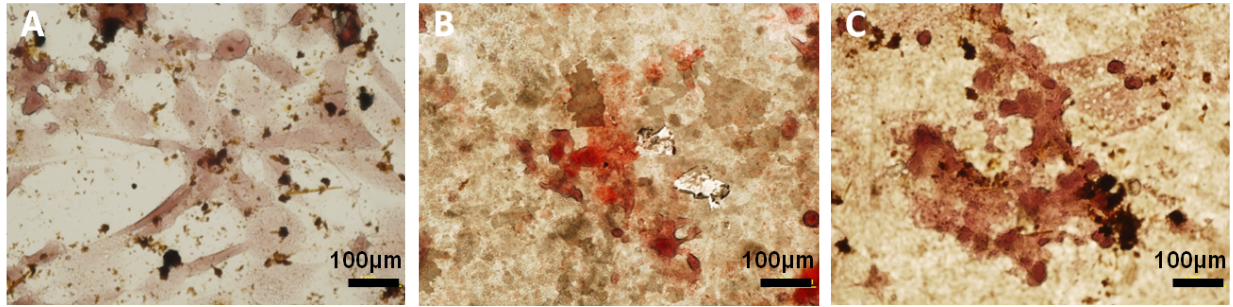

**Fig. S2** Alizarin Red S staining of mineral on glass (A), GO (B), and GO-Gel (C) after 14 days mineralization.
